# Supplementary material
Source: PubMed Central journal article supplement (PMC6465737)
Supplement: ofa-0012-0067-s01.pdf [file ofa-0012-0067-s01.pdf]

Supplementary File 1.

**Table. Some results of women and <45 years old (n=5983)**

|                     | Renal_function_impairment<br>(=0) | Renal_function_impairment<br>(=1) |
|---------------------|-----------------------------------|-----------------------------------|
| Obese_type_3gr (=1) | 2372                              | 74                                |
| Obese_type_3gr (=2) | 3344                              | 121                               |
| Obese_type_3gr (=3) | 59                                | 13                                |

**Traditional adjustment for odds ratio**

$$\text{Odds ratio (Obese\_type\_3gr (=2) vs Obese\_type\_3gr (=1))} = \frac{2372.5 * 121.5}{74.5 * 3344.5} = 1.156897882$$

$$\text{Odds ratio (Obese\_type\_3gr (=3) vs Obese\_type\_3gr (=1))} = \frac{2372.5 * 13.5}{74.5 * 59.5} = 7.225480796$$

**Penalized logistic regression for model 1**

logistf(formula = group ~ gr, data = tmp)

Model fitted by Penalized ML

Confidence intervals and p-values by Profile Likelihood Profile Likelihood Profile Likelihood

|             | coef       | se(coef)   | lower 0.95  | upper 0.95 | Chisq | p |
|-------------|------------|------------|-------------|------------|-------|---|
| (Intercept) | 3.56829136 | 0.1237963  | 3.55713714  | 3.580294   | Inf   | 0 |
| gr2         | 0.07270674 | 0.1640589  | 0.05740142  | 0.088090   | 0     | 1 |
| gr3         | 6.84079185 | 23.2058132 | -6.44045815 | 14.731417  | Inf   | 0 |

Likelihood ratio test=863.7972 on 2 df, p=0, n=5983

Wald test = 0.2822565 on 2 df, p = 0.8683779

Covariance-Matrix:

|      | [,1]        | [,2]        | [,3]         |
|------|-------------|-------------|--------------|
| [1,] | 0.01532553  | -0.01532553 | -0.01532553  |
| [2,] | -0.01532553 | 0.02691531  | 0.01532553   |
| [3,] | -0.01532553 | 0.01532553  | 538.50976616 |

nobs(fit)

[1] 5983

drop1(fit)

ChiSq df P-value

gr 863.7972 2 0

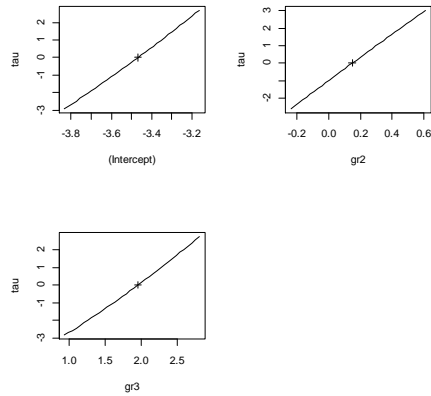

Figure. Likelihood plot of adjustment in model 1

### Penalized logistic regression for model 2

logistf(formula = group ~ gr + MAP, data = tmp)

Model fitted by Penalized ML

Confidence intervals and p-values by Profile Likelihood Profile Likelihood Profile Likelihood Profile Likelihood

|             | coef        | se(coef)     | lower 0.95  | upper 0.95   | Chisq    |
|-------------|-------------|--------------|-------------|--------------|----------|
| (Intercept) | 1.01057879  | 0.695825711  | 0.94198131  | 1.076287099  | 43.41446 |
| gr2         | -0.01891949 | 0.163258929  | -0.03463120 | -0.003249591 | 0.00000  |
| gr3         | 6.40344649  | 22.600873369 | -4.76841277 | 14.294071491 | Inf      |
| MAP         | 0.03272033  | 0.008972257  | 0.03187941  | 0.033611097  | 0.00000  |

p

|             |              |
|-------------|--------------|
| (Intercept) | 4.429035e-11 |
| gr2         | 1.000000e+00 |
| gr3         | 0.000000e+00 |
| MAP         | 1.000000e+00 |

Likelihood ratio test=770.8779 on 3 df, p=0, n=5983

Wald test = 13.48895 on 3 df, p = 0.003690148

Covariance-Matrix:

```

          [,1]      [,2]      [,3]      [,4]
[1,] 0.484173420 -0.0018091335 5.421797e-02 -0.0061455443
[2,] -0.001809133 0.0266534780 1.696661e-02 -0.0001730172
[3,] 0.054217971 0.0169666120 5.107995e+02 -0.0009069245
[4,] -0.006145544 -0.0001730172 -9.069245e-04 0.0000805014
nobs(fit)
[1] 5983
drop1(fit)
      ChiSq df P-value
gr 206.17588 2      0
MAP -94.58231 1      1

```

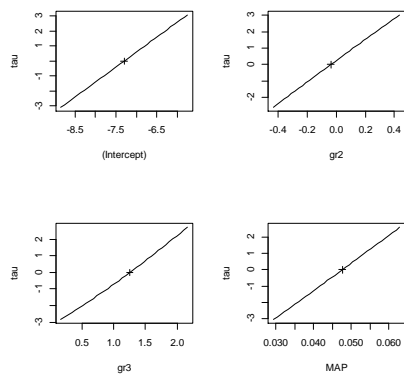

Figure. Likelihood plot of adjustment in model 2

### Penalized logistic regression for model 3

```
logistf(formula = group ~ gr + MAP + Fasting_glucose + CRP, data = tmp)
```

Model fitted by Penalized ML

Confidence intervals and p-values by Profile Likelihood Profile Likelihood Profile Likelihood Profile Likelihood Profile Likelihood

|                 | coef        | se(coef)     | lower 0.95  | upper 0.95  | Chisq | p |
|-----------------|-------------|--------------|-------------|-------------|-------|---|
| (Intercept)     | -0.06363357 | 1.090246118  | -0.17189894 | 0.03928907  | 0     | 1 |
| gr2             | -0.08052565 | 0.166258646  | -0.09665287 | -0.06458078 | 0     | 1 |
| gr3             | 6.20044380  | 22.528281338 | -4.93702267 | 14.09106880 | Inf   | 0 |
| MAP             | 0.02990680  | 0.009071667  | 0.02905015  | 0.03080735  |       |   |
| 0               | 1           |              |             |             |       |   |
| Fasting_glucose | 0.26004959  | 0.196671303  | 0.24143698  | 0.27937990  | 0     | 1 |

CRP                    0.04058502   0.050252642   0.03590141   0.04560219   0  
1

Likelihood ratio test=745.809 on 5 df, p=0, n=5983

Wald test = 15.55396 on 5 df, p = 0.008239918

Covariance-Matrix:

|      | [,1]         | [,2]          | [,3]          | [,4]          | [,5]          |
|------|--------------|---------------|---------------|---------------|---------------|
| [1,] | 1.188636598  | 0.0188387838  | 0.106580779   | -4.935500e-03 | -0.1652879931 |
| [2,] | 0.018838784  | 0.0276419373  | 0.021498700   | -1.243653e-04 | -0.0049023854 |
| [3,] | 0.106580779  | 0.0214986998  | 507.523460024 | -7.639020e-04 | -0.0123329332 |
| [4,] | -0.004935500 | -0.0001243653 | -0.000763902  | 8.229515e-05  | -0.0002774260 |
| [5,] | -0.165287993 | -0.0049023854 | -0.012332933  | -2.774260e-04 | 0.0386796014  |
| [6,] | 0.001904037  | -0.0011187851 | -0.006462245  | -2.041809e-05 | -0.0003678285 |

[,6]

[1,] 1.904037e-03

[2,] -1.118785e-03

[3,] -6.462245e-03

[4,] -2.041809e-05

[5,] -3.678285e-04

[6,] 2.525328e-03

nobs(fit)

[1] 5983

drop1(fit)

ChiSq df P-value

gr                    196.65275   2            0

MAP                    -75.42210   1            1

Fasting\_glucose -15.97047   1            1

CRP                    -10.95856   1            1

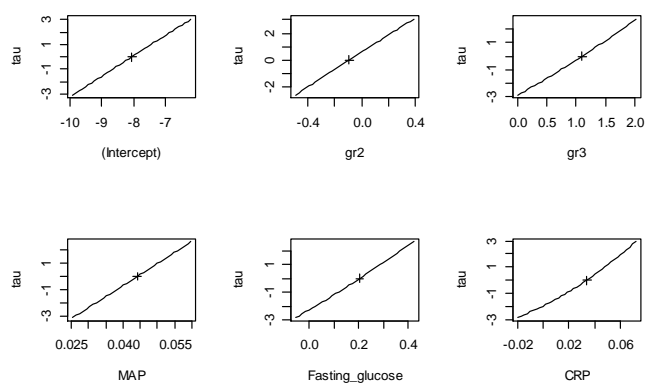

Figure. Likelihood plot of adjustment in model 3
